# Supplementary material for: Curcumin Blocks High Glucose-Induced Podocyte Injury via RIPK3-Dependent Pathway
Source: PubMed Central journal article supplement (PMC9189280; doi:10.3389/fcell.2022.800574), 2022-05-30
Supplement: Image1.pdf [file Image1.pdf]

# Curcumin blocks high glucose-induced podocyte injury via RIPK3 - dependent pathway

Hyunsoo Chung<sup>1†</sup>, Seong-Woo Lee<sup>2,3†</sup>, Miri Hyun<sup>2†</sup>, So Young Kim<sup>2</sup>, Hyeon Gyu Cho<sup>1</sup>, Eun Soo Lee<sup>4,5</sup>, Jeong Suk Kang<sup>2,6</sup>, Choon Hee Chung<sup>4,5</sup>, Eun Young Lee<sup>1,2,3,6\*</sup>

<sup>1</sup> College of Medicine, Soonchunhyang University, Cheonan, Korea

<sup>2</sup> Department of Internal Medicine, Soonchunhyang University Cheonan Hospital, Cheonan, Korea

<sup>3</sup> BK21 Four Project, College of Medicine, Soonchunhyang University, Cheonan, Korea

<sup>4</sup> Department of Internal Medicine, Yonsei University Wonju College of Medicine, Wonju, Korea

<sup>5</sup> Institution of Genetic Cohort, Yonsei University Wonju College of Medicine, Wonju, Korea

<sup>6</sup> Institute of Tissue Regeneration, College of Medicine, Soonchunhyang University, Cheonan, Korea

† These authors contributed equally to this work as co-first authors.

**\* Correspondence:**

Eun Young Lee, MD, PhD

[eylee@sch.ac.kr](mailto:eylee@sch.ac.kr)

**Keywords: diabetic nephropathy, curcumin, necroptosis, RIPK3, antioxidant**

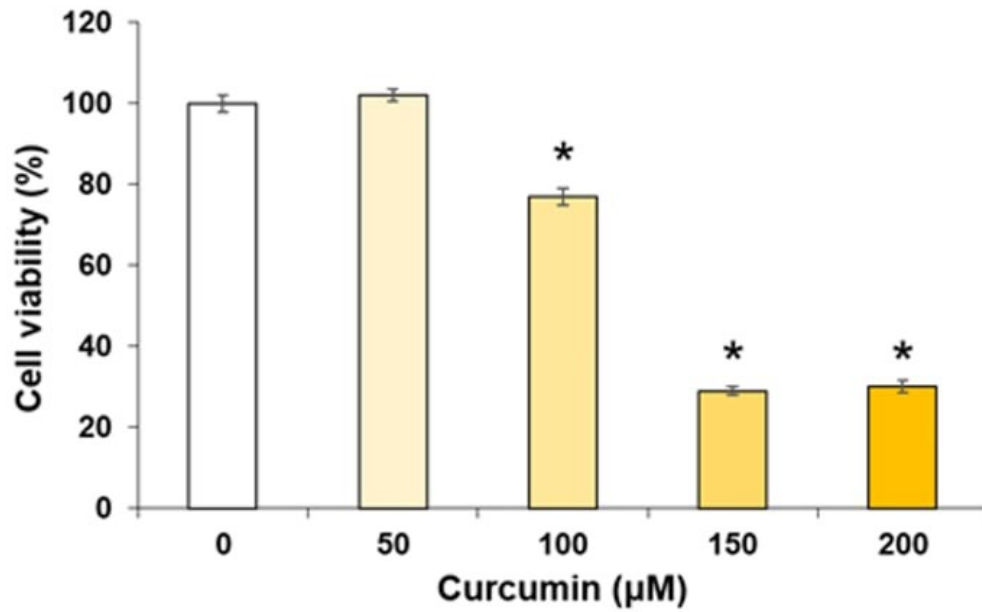

**Supplementary Figure 1. Cytotoxic concentration of curcumin.** Podocytes were treated with curcumin at indicated concentrations for 24 h. Cell viability was determined by MTT assay. Doses ranging from 100 to 200 µM caused decrement of cell viability. \*,  $p < 0.05$ .
